# Supplementary material for: Estimating overdiagnosis in giant cell arteritis diagnostic pathways using genetic data: genetic association study
Source: bioRxiv or medRxiv preprint supplement (doi:10.1101/2023.04.17.23288682), 2023-04-24
Supplement: Supplementary file [file media-2.pdf]

## Appendix 1

### UK GCA Consortium

**Management Team:** Ann W Morgan<sup>1</sup>, Sarah L Mackie<sup>1</sup>, Louise Sorensen<sup>1</sup>

**Laboratory Team:** Lubna Haroon Raashid<sup>1</sup>, Steve Martin<sup>1</sup>, James I Robinson<sup>1</sup>, Sam Mellen<sup>6</sup>, Sarah Hoggart<sup>6</sup>,

**Analysis Team:** Jennifer H Barrett<sup>1</sup>, John C Taylor<sup>1</sup>

**Consultants:** Colin Pease<sup>1</sup>, Bhaskar Dasgupta<sup>2</sup>, Richard Watts<sup>3</sup>, Andrew Gough<sup>4</sup>, John D Isaacs<sup>5</sup>, Michael Green<sup>6</sup>, Neil McHugh<sup>7</sup>, Lesley Hordon<sup>8</sup>, Sanjeet Kamath<sup>9</sup>, Mohammed Nisar<sup>10</sup>, Yusuf Patel<sup>11</sup>, Chee-Seng Yee<sup>12</sup>, Robert Stevens<sup>12</sup>, Pradip Nandi<sup>13</sup>, Anupama Nandagudi<sup>14</sup>, Stephen Jarrett<sup>15</sup>, Charles Li<sup>16</sup>, Sarah Levy<sup>17</sup>, Susan Mollan<sup>18</sup>, Abdel Salih<sup>19</sup>

**Nursing and Study Team:** Oliver Wordsworth<sup>1</sup>, Prisca Gondo<sup>2</sup>, Jane Hollywood<sup>2</sup>, Genessa Peters<sup>3</sup>, Christine Routledge<sup>5</sup>, Anne Gill<sup>6</sup>, Lisa Carr<sup>6</sup>, Rose Wood<sup>7</sup>, Clare Williams<sup>10</sup>, Mandy Oakley<sup>10</sup>, Emma Sanders<sup>11</sup>, Felicity Mackenzie<sup>12</sup>, Rosanna Fong<sup>12</sup>, Lynne James<sup>13</sup>, Jenny Spimpolo<sup>13</sup>, Andy Kempa<sup>13</sup>, Karen Culfeer<sup>14</sup>, Asanka Nugaliyadde<sup>14</sup>, Esme Roads<sup>16</sup>, Bridie Rowbotham<sup>18</sup>, Zahira Masgood<sup>18</sup>

<sup>1</sup>School of Medicine, University of Leeds and NIHR-Leeds Musculoskeletal Biomedical Research Unit, Leeds Teaching Hospitals NHS Trust, LS7 4SA, UK

<sup>2</sup>Southend Hospital, Prittlewell Chase, Westcliff-on-Sea, Essex, SS0 0RY, UK

<sup>3</sup>Ipswich Hospital, Heath Road, Ipswich, Suffolk, IP4 5PD, UK

<sup>4</sup>Harrogate District Hospital, Lancaster Park Rd, Harrogate, HG2 7SX, UK

<sup>5</sup>Freeman Hospital, Freeman Road, High Heaton, Newcastle upon Tyne, Tyne and Wear, NE7 7DN, UK

<sup>6</sup>York District Hospital, Wigginton Road, York, YO31 8HE, UK

<sup>7</sup>Royal National Hospital for Rheumatic Diseases, Upper Borough Walls, Bath, Avon, BA1 1RL, UK

<sup>8</sup>Dewsbury District and General Hospital, Halifax Road, Dewsbury, WF13 4HS, UK

<sup>9</sup>Haywood Hospital, High Lane, Burslem, Staffordshire, ST6 7AG, UK

<sup>10</sup>Queen's Hospital, Belvedere Road, Burton-on-Trent, DE13 0RB, UK

<sup>11</sup>Hull Royal Infirmary, Anlaby Road, Hull, HU3 2JZ, UK

<sup>12</sup>Doncaster Royal Infirmary, Armthorpe Road, Doncaster, DN2 5LT, UK

<sup>13</sup>Northampton General Hospital, Cliftonville, Northampton, NN1 5BD, UK

<sup>14</sup>Basildon University Hospital, Nethermayne, Basildon, SS16 5NL, UK

<sup>15</sup>Pinderfields General Hospital, Aberford Road, Wakefield, WF1 4DG, UK

<sup>16</sup>Royal Surrey County Hospital, Egerton Road, Guildford, GU2 7XX, UK

<sup>17</sup>Croydon University Hospital, 530 London Road, Croydon, Surrey, CR7 7YE, UK

<sup>18</sup>Queen Elizabeth Hospital, Mindelsohn Way, Birmingham, B15 2TH, UK

<sup>19</sup>Warrington Hospital, Lovely Lane, Warrington, Cheshire, WA5 1QG, UK
